# Supplementary material for: Sex-stratified genome-wide association and transcriptome-wide Mendelian randomization studies reveal drug targets of heart failure
Source: PubMed Central journal article supplement — Cell Rep Med. 2024 Jan 17;5(2):101382. doi: 10.1016/j.xcrm.2023.101382 (PMC10897518; doi:10.1016/j.xcrm.2023.101382), 2024-01-17
Supplement: mmc1.pdf [file mmc1.pdf]

**Cell Reports Medicine, Volume 5**

**Supplemental information**

**Sex-stratified genome-wide association  
and transcriptome-wide Mendelian randomization  
studies reveal drug targets of heart failure**

**Qianqian Yang, Qian Yang, Xueyan Wu, Ruizhi Zheng, Hong Lin, Shuangyuan Wang, Jacob Joseph, Yan V. Sun, Mian Li, Tiange Wang, Zhiyun Zhao, Min Xu, Jieli Lu, Yuhong Chen, Guang Ning, Weiqing Wang, Yufang Bi, Jie Zheng, and Yu Xu**

Figure S1. Comparison of causal effects estimated for heart failure using sex-stratified and sex-combined eQTLs data, related to Figure 2.

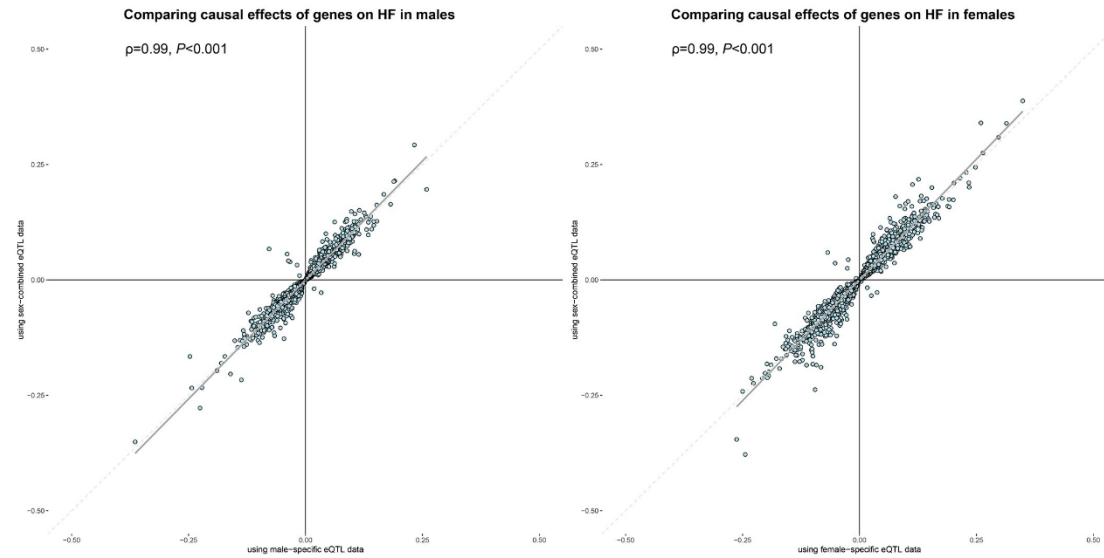

HF, heart failure. The x-axis represents estimates using sex-stratified eQTLs data and the y-axis represents estimates using sex-combined eQTLs data. The grey smoothing lines and shaded regions around them represent the overall trend and 95% confidence intervals (CI) of the estimates.  $\rho$  calculated by Spearman correlation methods were used to quantify the correlations.

**Table S1. Summary of data processing for the eQTLs, related to STAR Methods.**

|                                                         | <b>Male</b>                      | <b>Female</b>                    | <b>Both sex</b>                 |
|---------------------------------------------------------|----------------------------------|----------------------------------|---------------------------------|
| <b>cis-eQTL with P&lt;1e-4</b>                          | 18235 eQTLs of 7872 genes        | 18248 eQTLs of 7914 genes        | 24145 eQTLs of 9680 genes       |
| <b>cis-eQTL with P&lt;1e-5</b>                          | 18235 (100%) eQTLs of 7872 genes | 18248 (100%) eQTLs of 7914 genes | 23689 (98%) eQTLs of 9558 genes |
| <b>Removing weak instruments (F-statistics&lt;10)</b>   | 15292 (84%) eQTLs of 6565 genes  | 15453 (85%) eQTLs of 6644 genes  | 15928 (66%) eQTLs of 6600 genes |
| <b>shared eQTLs available in both males and females</b> | 10592 (58%) eQTLs of 4589 genes  |                                  |                                 |
| <b>match with HF</b>                                    | 6555 eQTLs of 3335 genes         |                                  | 12437 eQTLs of 5656 genes       |
| <b>after steiger filtering</b>                          | 6555 eQTLs of 3335 genes         |                                  | 12437 eQTLs of 5656 genes       |
| <b>match with LVEF</b>                                  | 7931 eQTLs of 3771 genes         |                                  | /                               |
| <b>after steiger filtering</b>                          | 7931 eQTLs of 3771 genes         |                                  | /                               |
| <b>match with HFrEF</b>                                 | 6254 eQTLs of 3304 genes         | /                                | /                               |
| <b>after steiger filtering</b>                          | 6254 eQTLs of 3304 genes         | /                                | /                               |
| <b>match with HFpEF</b>                                 | 6254 eQTLs of 3304 genes         | /                                | /                               |
| <b>after steiger filtering</b>                          | 6254 eQTLs of 3304 genes         | /                                | /                               |

**Table S2. Data sources, related to STAR Methods**

| Phenotype | Sex                        | Case                    | Control                  | Total Participants              | Reference        |
|-----------|----------------------------|-------------------------|--------------------------|---------------------------------|------------------|
| eQTLs     | Both sex, male, and female | /                       | /                        | 838<br>(557 males, 281 females) | GTE <sub>x</sub> |
| LVEF      | Male                       | /                       | /                        | 17,899                          | This study       |
| LVEF      | Female                     | /                       | /                        | 19,467                          | This study       |
| HF        | Both sex                   | 47,309<br>(59.1% males) | 930,014<br>(47.2% males) | 977,323                         | HERMES           |
| HF        | Both sex                   | 28,795                  | 772,854                  | 801,649                         | GBMI             |
| HF        | Male                       | 10,288                  | 10,006                   | 20,294                          | GBMI             |
| HF        | Female                     | 6,414                   | 12,211                   | 18,625                          | GBMI             |
| HFrEF     | Male-dominate              | 19,495                  | 258,943                  | 278,438                         | MVP              |
| HFpEF     | Male-dominate              | 19,589                  | 258,943                  | 278,532                         | MVP              |

GTE<sub>x</sub>, Genotype-Tissue Expression project; HERMES, Heart Failure Molecular Epidemiology for Therapeutic Targets Consortium; GBMI, Global Biobank Meta-analysis Initiative; MVP, Million Veteran Program.

**Table S13. Sex-differential genes showed robust causal effects on LVEF in both males and females, related to STAR Methods**

| Exposure           | Gene    | SNP         | Tissue                   | Outcome | Male                 |          | Female            |          | P(Z)     |
|--------------------|---------|-------------|--------------------------|---------|----------------------|----------|-------------------|----------|----------|
|                    |         |             |                          |         | Effect size          | P value  | Effect size       | P value  |          |
| ENSG00000172322.13 | CLEC12A | rs199560361 | Adipose_Visceral_Omentum | LVEF    | -0.22 (-0.38, -0.06) | 6.33E-03 | 0.17 (0.03, 0.31) | 1.46E-02 | 2.50E-04 |
| ENSG00000256660.5  | CLEC12B | rs199560361 | Adipose_Subcutaneous     | LVEF    | -0.17 (-0.29, -0.05) | 6.33E-03 | 0.15 (0.03, 0.27) | 1.46E-02 | 2.60E-04 |
| ENSG00000172322.13 | CLEC12A | rs199560361 | Adipose_Subcutaneous     | LVEF    | -0.15 (-0.26, -0.04) | 6.33E-03 | 0.14 (0.03, 0.25) | 1.46E-02 | 2.82E-04 |
| ENSG00000165682.14 | CLEC1B  | rs199560361 | Adipose_Subcutaneous     | LVEF    | -0.16 (-0.28, -0.05) | 6.33E-03 | 0.15 (0.03, 0.28) | 1.46E-02 | 2.51E-04 |
| ENSG00000172322.13 | CLEC12A | rs199560361 | Heart_Left_Ventricle     | LVEF    | -0.16 (-0.28, -0.05) | 6.33E-03 | 0.17 (0.03, 0.30) | 1.46E-02 | 2.55E-04 |
| ENSG00000256660.5  | CLEC12B | rs199560361 | Adipose_Visceral_Omentum | LVEF    | -0.23 (-0.39, -0.06) | 6.33E-03 | 0.25 (0.05, 0.45) | 1.46E-02 | 2.96E-04 |
| ENSG00000172322.13 | CLEC12A | rs199560361 | Artery_Tibial            | LVEF    | -0.21 (-0.36, -0.06) | 6.33E-03 | 0.16 (0.03, 0.29) | 1.46E-02 | 2.62E-04 |
| ENSG00000165682.14 | CLEC1B  | rs199560361 | Whole_Blood              | LVEF    | -0.57 (-0.98, -0.16) | 6.33E-03 | 0.37 (0.07, 0.66) | 1.46E-02 | 2.71E-04 |
| ENSG00000125510.15 | OPRL1   | rs8126001   | Pancreas                 | LVEF    | -0.19 (-0.31, -0.06) | 3.51E-03 | 0.16 (0.05, 0.27) | 6.07E-03 | 6.18E-05 |

**Table S14. SNPs robustly and independently associated with LVEF in males and females, related to Figure 4**

| <b>Sex</b>    | <b>SNP</b> | <b>gene</b>  | <b>eaf</b> | <b>beta</b> | <b>se</b> | <b>F statistics</b> | <b>pval</b> |
|---------------|------------|--------------|------------|-------------|-----------|---------------------|-------------|
| <b>male</b>   | rs848217   | ZBTB17       | 0.499887   | -0.458882   | 0.0664135 | 47.74075782         | 4.90E-12    |
|               | rs2128160  | LOC105376958 | 0.440248   | 0.396163    | 0.0671817 | 34.77329501         | 3.70E-09    |
|               | rs4151702  | CDKN1A       | 0.801135   | -0.584733   | 0.0835766 | 48.94922383         | 2.60E-12    |
|               | rs72840788 | BAG3         | 0.781904   | -0.585573   | 0.0814678 | 51.66424777         | 6.60E-13    |
| <b>female</b> | rs730506   | CDKN1A       | 0.802495   | -0.451082   | 0.0709352 | 40.43778879         | 2.00E-10    |
|               | rs72840788 | BAG3         | 0.783594   | -0.531044   | 0.0686636 | 59.81469238         | 1.00E-14    |

**Table S15. Effects of LVEF on HF/HF subtypes, related to Figure 4**

| <b>Exposure</b> | <b>Outcome</b> | <b>Method</b>             | <b>N_SNP</b> | <b>b</b>     | <b>se</b>   | <b>pval</b> | <b>OR<br/>(95% CI)</b> |
|-----------------|----------------|---------------------------|--------------|--------------|-------------|-------------|------------------------|
| female_LVEF     | female_GBMI    | Inverse variance weighted | 2            | -0.175773872 | 0.034175602 | 2.70E-07    | 0.84<br>(0.78-0.90)    |
| male_LVEF       | male_GBMI      | MR Egger                  | 4            | -0.370140541 | 0.105995004 | 0.073123555 | 0.69<br>(0.56-0.85)    |
|                 |                | Weighted median           | 4            | -0.108287229 | 0.024368229 | 8.84E-06    | 0.90<br>(0.86-0.94)    |
|                 |                | Inverse variance weighted | 4            | -0.109444117 | 0.025561144 | 1.86E-05    | 0.90<br>(0.85-0.94)    |
|                 |                | Simple mode               | 4            | -0.124971553 | 0.041590649 | 0.057448914 | 0.88<br>(0.81-0.96)    |
|                 |                | Weighted mode             | 4            | -0.122956324 | 0.039265025 | 0.052007152 | 0.88<br>(0.82-0.96)    |
| male_LVEF       | MVP_HFrEF      | MR Egger                  | 3            | -0.452341496 | 0.157675332 | 0.213525803 | 0.64<br>(0.47-0.87)    |
|                 |                | Weighted median           | 3            | -0.189090722 | 0.026841807 | 1.86E-12    | 0.83<br>(0.79-0.87)    |
|                 |                | Inverse variance weighted | 3            | -0.199669018 | 0.025064276 | 1.64E-15    | 0.82<br>(0.78-0.86)    |
|                 |                | Simple mode               | 3            | -0.192349092 | 0.037073279 | 0.035198869 | 0.83<br>(0.77-0.89)    |
|                 |                | Weighted mode             | 3            | -0.179571667 | 0.035441937 | 0.036816817 | 0.84<br>(0.78-0.90)    |
| male_LVEF       | MVP_HFpEF      | MR Egger                  | 3            | -0.009085125 | 0.264713768 | 0.978159424 | 0.99                   |

|  |  |                              |   |             |             |             |                     |
|--|--|------------------------------|---|-------------|-------------|-------------|---------------------|
|  |  |                              |   |             |             |             | (0.59-1.66)         |
|  |  | Weighted median              | 3 | 0.028997452 | 0.018720109 | 0.121381684 | 1.03<br>(0.99-1.07) |
|  |  | Inverse variance<br>weighted | 3 | 0.026729423 | 0.02218512  | 0.228266763 | 1.03<br>(0.98-1.07) |
|  |  | Simple mode                  | 3 | 0.041570141 | 0.027436769 | 0.268968003 | 1.04<br>(0.99-1.10) |
|  |  | Weighted mode                | 3 | 0.038271035 | 0.030107438 | 0.331512881 | 1.04<br>(0.98-1.10) |
